# Supplementary material for: An investigation of near miss organizational learning in nursing organization: A mixed method study
Source: Research Square preprint supplement (doi:10.21203/rs.3.rs-1233807/v1), 2022-02-10
Supplement: Supplementary file 1 [file 4b8e30c152ecc8fefd21faf8.docx]

**GRAMMS checklist**

| **Item No** | | **Item description** | **Page No.** |
| --- | --- | --- | --- |
| **Domain 1: Describe the justification for using a mixed methods approach to the research question** | | | |
| 1a | | Justification for including quantitative design | 4 |
| 1b | | Justification for including qualitative design | 4 |
| 1c | | Justification for using a mixed methods approach | 4 |
| **Domain 2: Describe the design in terms of the purpose, priority and sequence of methods** | | |  |
| 2a | | Purpose | 4 |
| 2b | | Priority | 4 |
| 2c | | Sequence | 4 |
| **Domain 3: Describe each method in terms of sampling, data collection and analysis** | | |  |
| Quantitative design | 3a | Sampling | 4 |
| 3b | Data collection | 4 |
| **Item No** | | **Item description** | **Page No.** |
| Quantitative design | 3c | Analysis | 8 |
| Qualitative design | 3d | Sampling | 4 |
| 3e | Data collection | 5 |
| 3f | Analysis | 8 |
| **Domain 4: Describe where integration has occurred, how it has occurred and who has participated in it** | | | |
| 4a | | Where integration has occurred | 8 |
| 4b | | How integration has occurred | 8 |
| 4c | | Who has participated in integration | 8 |
| **Domain 5: Describe any limitation of one method associated with the present of the other method** | | | |
| 5 | | Limitation of one method associated with the present of the other method | 4 |
| **Domain 6: Describe any insights gained from mixing or integrating methods** | | | |
|  | | Insights gained from mixing or integrating methods | 15-17 |
